# Supplementary material for: Arginine Methylation of hnRNPK Inhibits the DDX3-hnRNPK Interaction to Play an Anti-Apoptosis Role in Osteosarcoma Cells
Source: MDPI journal article supplement (doi:10.3390/ijms22189764), 2021-09-09
Supplement: s1 [file s1]

## **Arginine methylation of hnRNPK inhibits the DDX3-hnRNPK interaction to play an anti-apoptosis role in osteosarcoma cells**

Chiao-Che Chen, <sup>#,1</sup> Jen-Hao Yang, <sup>#,1</sup> Shu-Ling Fu,<sup>2</sup> Wey-Jinq Lin,<sup>3</sup> and Chao-Hsiung Lin<sup>1,3,4\*</sup>

<sup>1</sup> Department of Life Sciences and Institute of Genome Sciences, National Yang Ming Chiao Tung University, Taipei 112, Taiwan

<sup>2</sup> Institute of Traditional Medicine, National Yang-Ming Chiao Tung University, Taipei 112, Taiwan

<sup>3</sup> Institute of Biopharmaceutical Sciences, National Yang Ming Chiao Tung University, Taipei 112, Taiwan

<sup>4</sup> Proteomics Research Center, National Yang Ming Chiao Tung University, Taipei 112, Taiwan

## **Supporting information**

### **Supplemental Figures**

Figure S1. U2OS-2RK cells exhibited more apoptosis than U2OS-WT cells under DNA damage.

Figure S2. The protein level of JUND was slightly increased upon DNA damage in U2OS-2RK cells but not in U2OS-WT cells.

Figure S3. Another DDX3 inhibitor, AVN A, did not obviously increase the cell apoptosis level or enhance the hnRNPK-DDX3 interaction during DNA damage.

Figure S4. RK-33 enhanced DNA damage-induced apoptosis in U2OS cells.

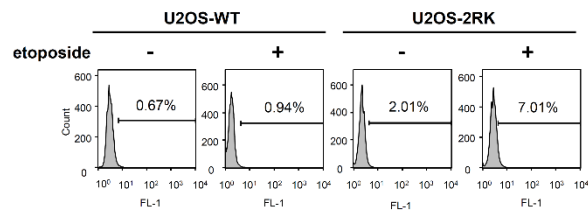

**Figure S1. U2OS-2RK cells exhibited more apoptosis than U2OS-WT cells under DNA damage.** U2OS-WT and U2OS-2RK cells were treated with etoposide (50  $\mu$ M) for 12 h. Cells were collected and analyzed by TUNEL assay to determine the degree of apoptosis using FACS.

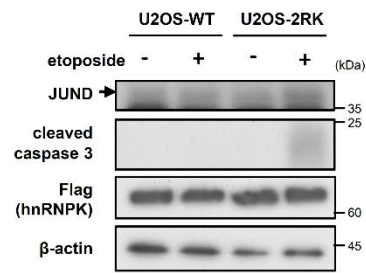

**Figure S2. The protein level of JUND was slightly increased upon DNA damage in U2OS-2RK cells but not in U2OS-WT cells.** U2OS-WT and U2OS-2RK (R296/299K) cells were treated with etoposide (50  $\mu$ M) for 12 h. The resulting cells were collected and analyzed to determine the protein levels of active caspase-3 and JUND.

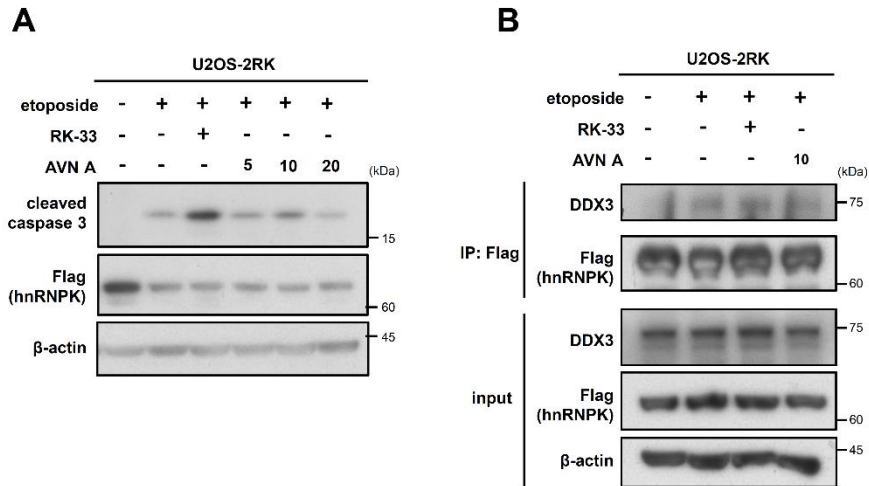

**Figure S3. Another DDX3 inhibitor, AVN A, did not obviously increase the cell apoptosis level or enhance the hnRNPK-DDX3 interaction during DNA damage. (A)** U2OS-2RK cells were treated with etoposide only (50  $\mu$ M), etoposide together with RK-33 (5  $\mu$ M), or AVN A (5, 10 and 20  $\mu$ M) for 12 h. Cell lysates were collected and analyzed for the expression levels of active caspase-3. **(B)** Under the same treatments described above, cell lysates were collected at 4 h and the interaction between hnRNPK and DDX3 was assessed.

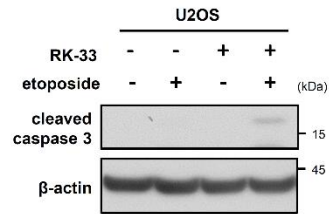

**Figure S4. RK-33 enhanced DNA damage-induced apoptosis in U2OS cells.** U2OS cells were treated with etoposide only (50  $\mu$ M), RK-33 only (5  $\mu$ M) or etoposide/RK-33 together for 12 h. Cell lysates were collected to determine the protein levels of active caspase-3.
